# Supplementary material
Source: PubMed Central journal article supplement (PMC5476365)

**Supplementary Figure S1.** Goodness of fits plot for final population pharmacokinetic model. Observed vs. population predicted concentrations (a); observed vs. individual predicted concentrations (b); conditional weight residual vs. population predicted concentrations (c); and conditional weight residual vs. time after dose (d).

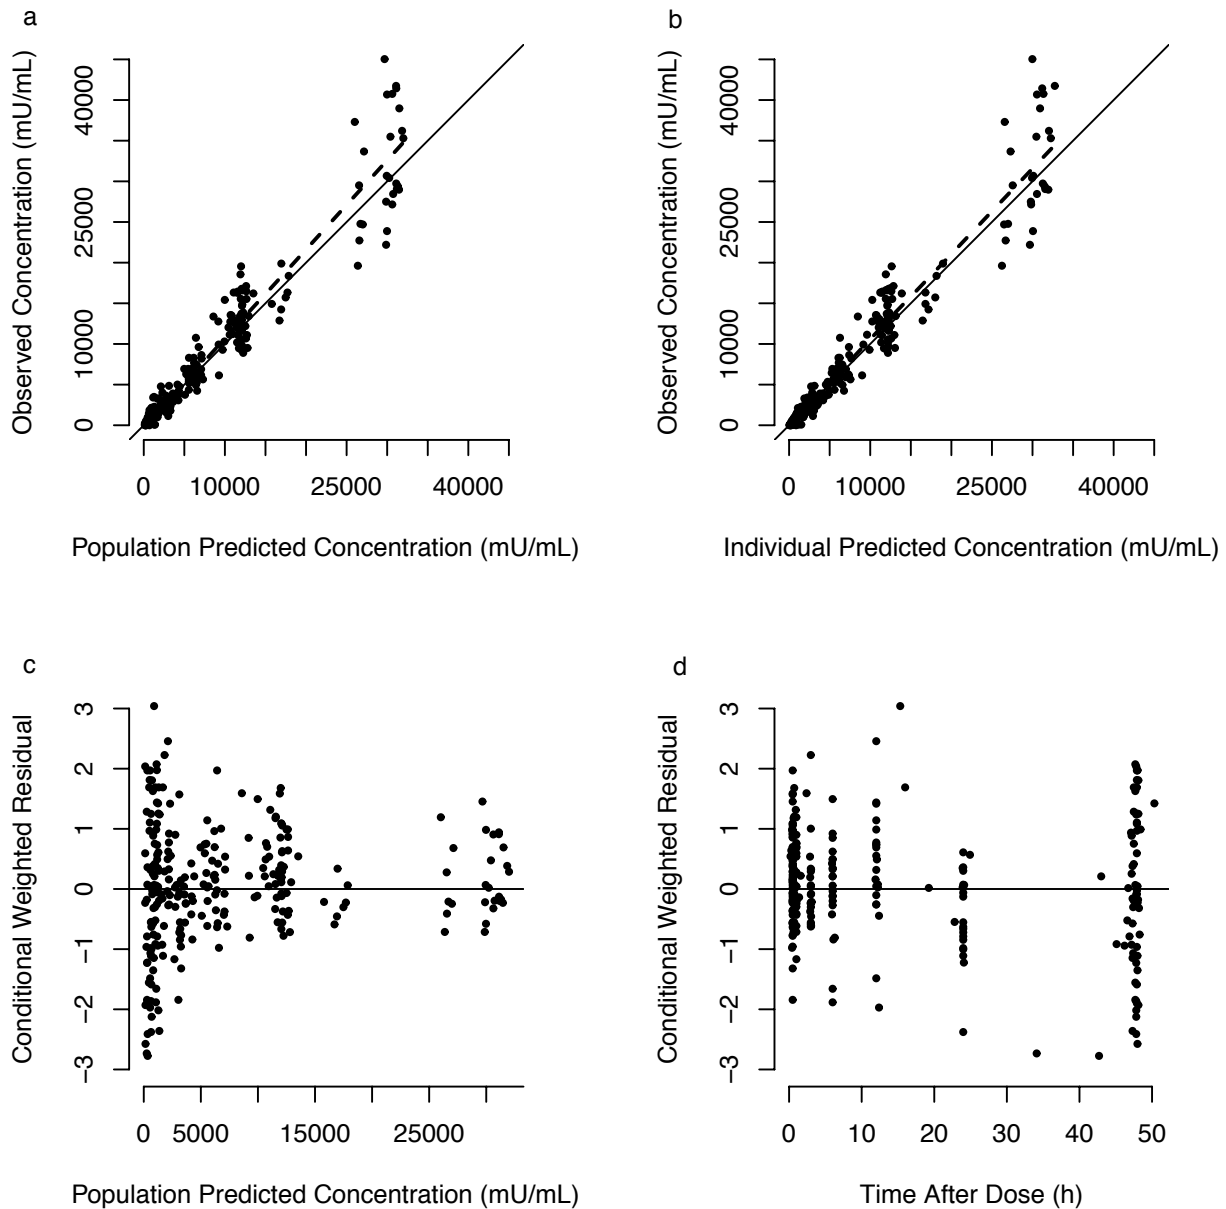

**Supplementary Figure S2.** Observed (solid circles) and predicted (solid lines) erythropoietin concentrations from the final population pharmacokinetic model after different doses in several individual patients.

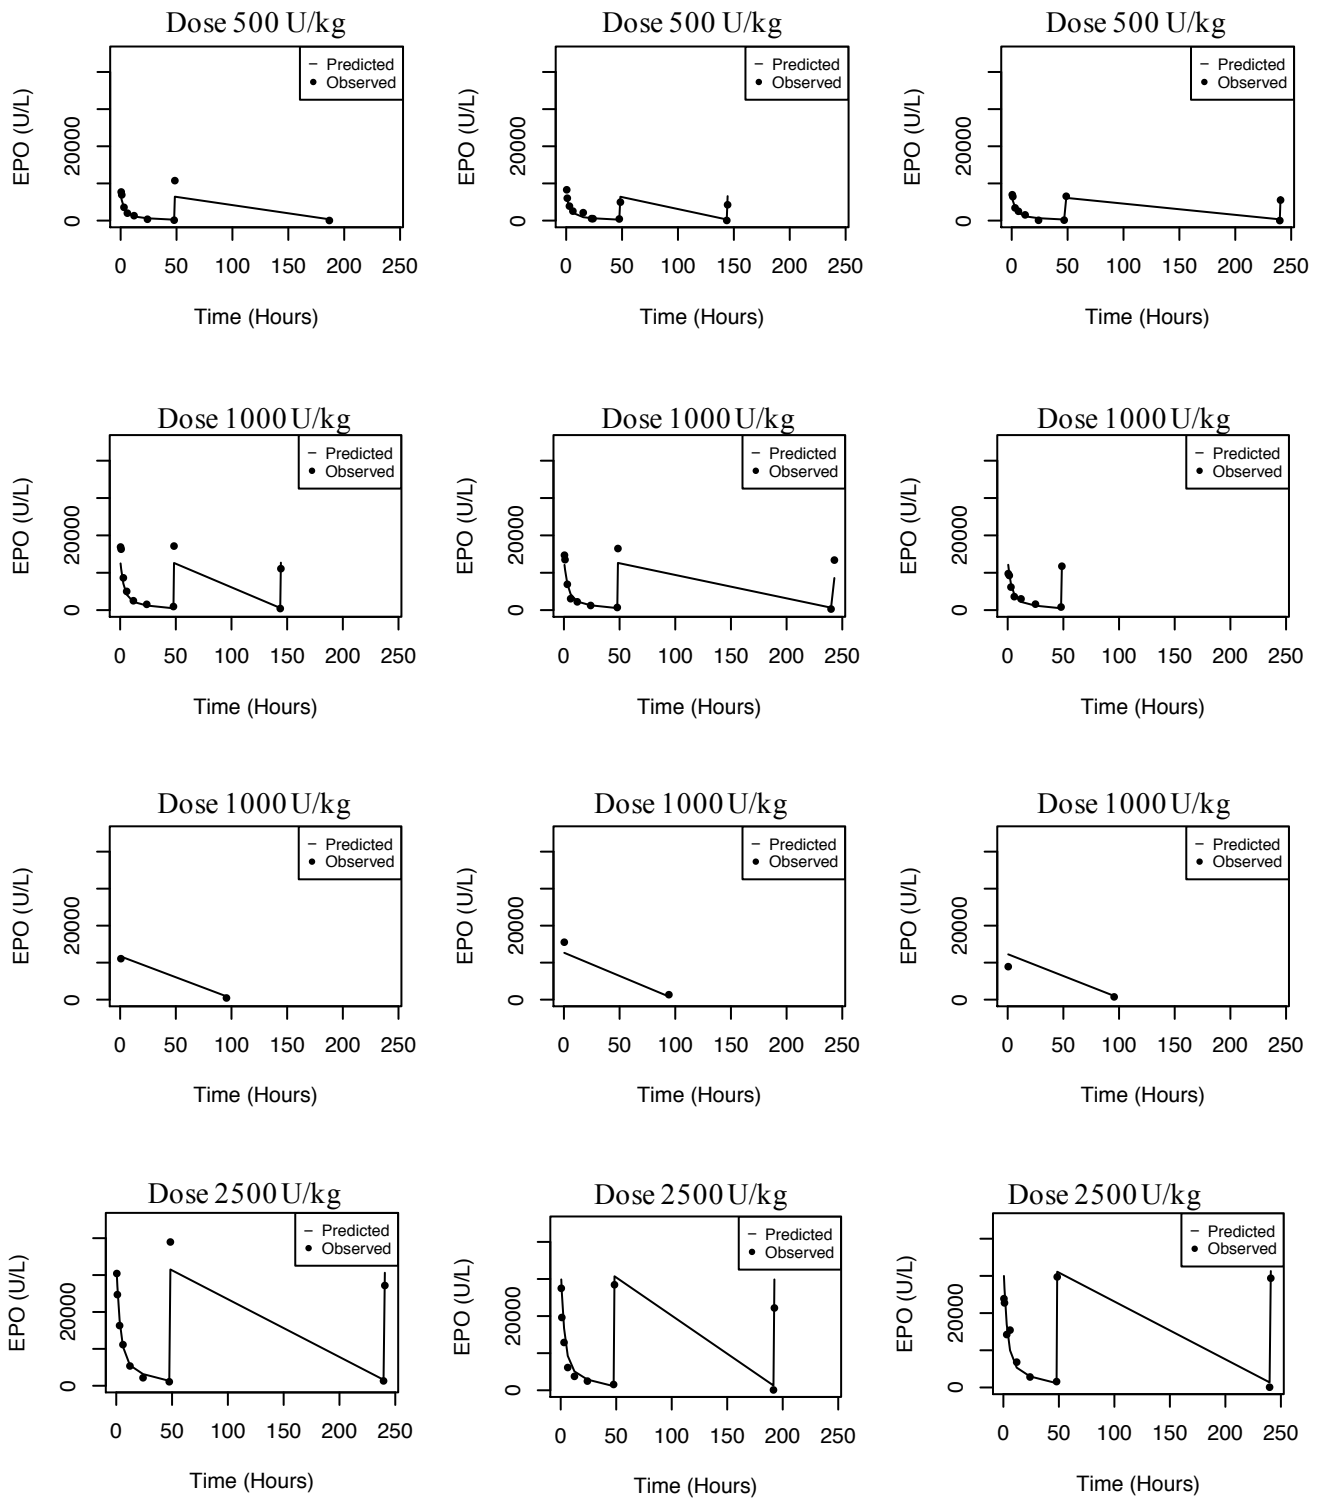

**Supplementary Figure S3.** Normalized prediction distribution errors (NPDE) of the final pharmacokinetic model for Epo. Histograms show the kernel density plot of NPDE with a normal, Gaussian distribution overlaid for comparative purposes (a). The distribution of NPDE versus predicted concentration (b), time since last dose (c), and birth weight (d) are also shown. Dotted lines represent the 5% and 95% of a standard normal distribution (i.e. 90% of NPDE should fall between this range).

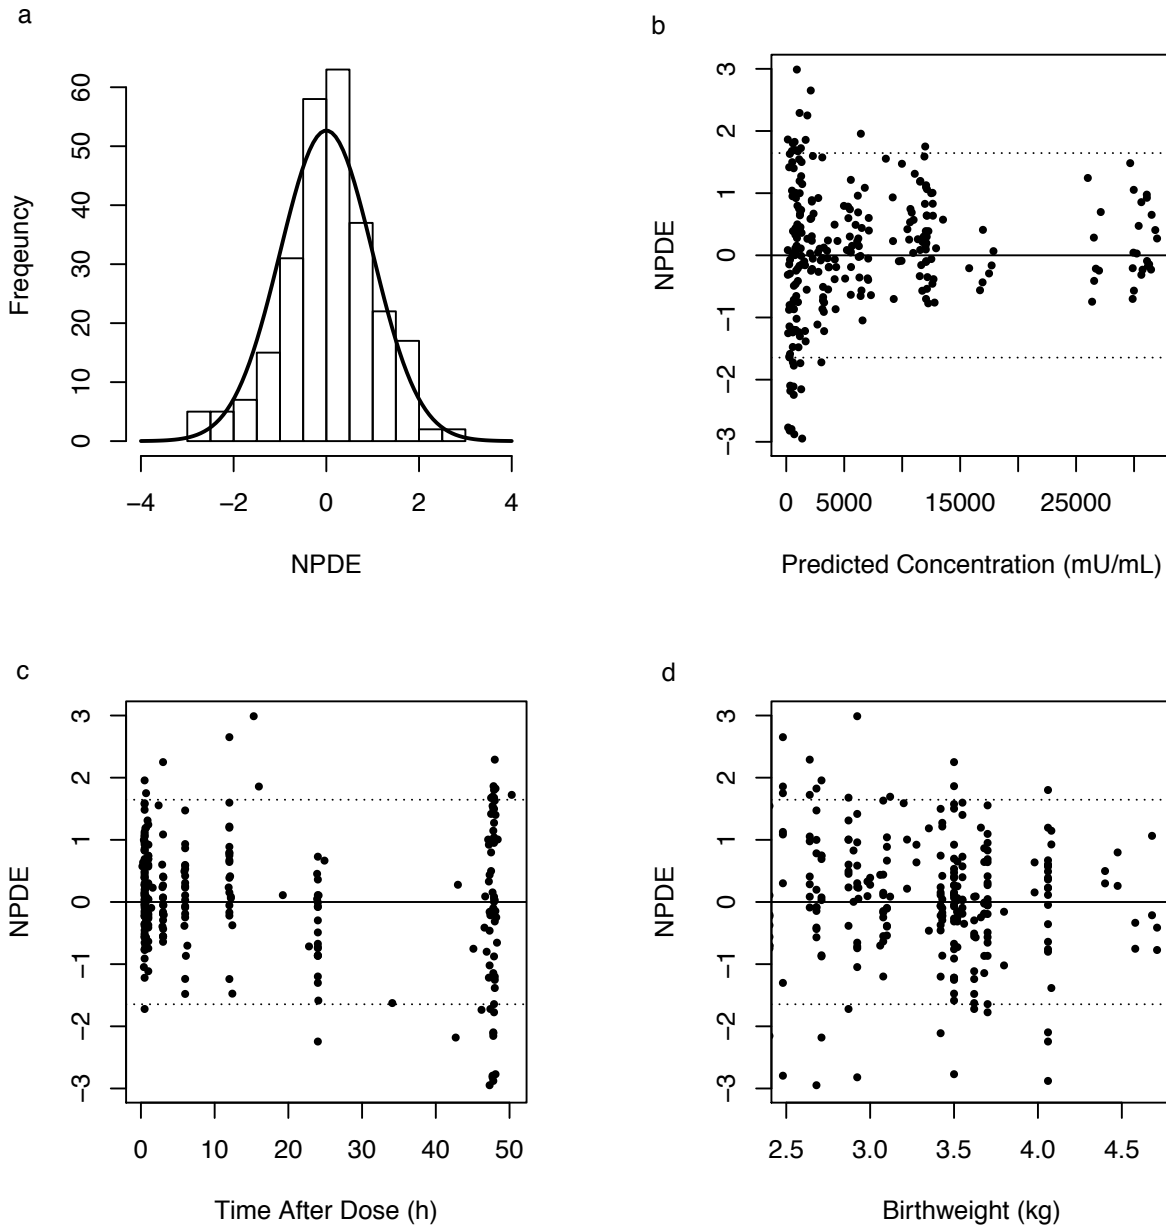

Supplement: NIHMS849261-supplement-supp_figs.pdf [file NIHMS849261-supplement-supp_figs.pdf]
